# Supplementary material
Source: publisher figshare collection journal article supplement (https://acs.figshare.com/ndownloader/files/4016533)
Supplement: Supplementary file 1 [file 4016533]

 
data_boshs10 
  
_audit_creation_method            SHELXL-97 
_chemical_name_systematic 
; 
 ? 
; 
_chemical_name_common             ? 
_chemical_melting_point           ? 
_chemical_formula_moiety          ? 
_chemical_formula_sum 
 'C16 H16 B Ga I2 N4 O2' 
_chemical_formula_weight          630.66 
  
loop_ 
 _atom_type_symbol 
 _atom_type_description 
 _atom_type_scat_dispersion_real 
 _atom_type_scat_dispersion_imag 
 _atom_type_scat_source 
 'C'  'C'   0.0033   0.0016 
 'International Tables Vol C Tables 4.2.6.8 and 6.1.1.4' 
 'H'  'H'   0.0000   0.0000 
 'International Tables Vol C Tables 4.2.6.8 and 6.1.1.4' 
 'N'  'N'   0.0061   0.0033 
 'International Tables Vol C Tables 4.2.6.8 and 6.1.1.4' 
 'O'  'O'   0.0106   0.0060 
 'International Tables Vol C Tables 4.2.6.8 and 6.1.1.4' 
 'Ga'  'Ga'   0.2307   1.6083 
 'International Tables Vol C Tables 4.2.6.8 and 6.1.1.4' 
 'I'  'I'  -0.4742   1.8119 
 'International Tables Vol C Tables 4.2.6.8 and 6.1.1.4' 
 'B'  'B'   0.0013   0.0007 
 'International Tables Vol C Tables 4.2.6.8 and 6.1.1.4' 
  
_symmetry_cell_setting            Orthorhombic 
_symmetry_space_group_name_H-M    Pbca 
  
loop_ 
 _symmetry_equiv_pos_as_xyz 
 'x, y, z' 
 '-x+1/2, -y, z+1/2' 
 '-x, y+1/2, -z+1/2' 
 'x+1/2, -y+1/2, -z' 
 '-x, -y, -z' 
 'x-1/2, y, -z-1/2' 
 'x, -y-1/2, z-1/2' 
 '-x-1/2, y-1/2, z' 
  
_cell_length_a                    20.5059(18) 
_cell_length_b                    15.3790(14) 
_cell_length_c                    24.714(2) 
_cell_angle_alpha                 90.00 
_cell_angle_beta                  90.00 
_cell_angle_gamma                 90.00 
_cell_volume                      7793.7(12) 
_cell_formula_units_Z             16 
_cell_measurement_temperature     130(2) 
_cell_measurement_reflns_used     6256 
_cell_measurement_theta_min       2.39 
_cell_measurement_theta_max       21.62 
  
_exptl_crystal_description        Plate 
_exptl_crystal_colour             Colorless 
_exptl_crystal_size_max           0.10 
_exptl_crystal_size_mid           0.05 
_exptl_crystal_size_min           0.02 
_exptl_crystal_density_meas       ? 
_exptl_crystal_density_diffrn     2.150 
_exptl_crystal_density_method     'not measured' 
_exptl_crystal_F_000              4768 
_exptl_absorpt_coefficient_mu     4.599 
_exptl_absorpt_correction_type    empirical 
_exptl_absorpt_correction_T_min   0.6563 
_exptl_absorpt_correction_T_max   0.9136 
_exptl_absorpt_process_details    sadabs
  
_exptl_special_details 
; 
 ? 
; 
  
_diffrn_ambient_temperature       130(2) 
_diffrn_radiation_wavelength      0.71073 
_diffrn_radiation_type            MoK\a 
_diffrn_radiation_source          'fine-focus sealed tube' 
_diffrn_radiation_monochromator   graphite 
_diffrn_measurement_device_type   'Bruker APEX-II CCD' 
_diffrn_measurement_method        '\f and \w scans' 
_diffrn_detector_area_resol_mean  ? 
_diffrn_reflns_number             68595 
_diffrn_reflns_av_R_equivalents   0.2089 
_diffrn_reflns_av_sigmaI/netI     0.0846 
_diffrn_reflns_limit_h_min        -22 
_diffrn_reflns_limit_h_max        22 
_diffrn_reflns_limit_k_min        -17 
_diffrn_reflns_limit_k_max        17 
_diffrn_reflns_limit_l_min        -27 
_diffrn_reflns_limit_l_max        27 
_diffrn_reflns_theta_min          1.65 
_diffrn_reflns_theta_max          23.26 
_reflns_number_total              5600 
_reflns_number_gt                 3404 
_reflns_threshold_expression      >2sigma(I) 
  
_computing_data_collection        'Bruker APEX2' 
_computing_cell_refinement        'Bruker SAINT' 
_computing_data_reduction         'Bruker SAINT' 
_computing_structure_solution     'SHELXS-97 (Sheldrick, 2008)' 
_computing_structure_refinement   'SHELXL-97 (Sheldrick, 2008)' 
_computing_molecular_graphics     'Bruker SHELXTL' 
_computing_publication_material   'Bruker SHELXTL' 
  
_refine_special_details 
; 
 Refinement of F^2^ against ALL reflections.  The weighted R-factor wR and 
 goodness of fit S are based on F^2^, conventional R-factors R are based 
 on F, with F set to zero for negative F^2^. The threshold expression of 
 F^2^ > 2sigma(F^2^) is used only for calculating R-factors(gt) etc. and is 
 not relevant to the choice of reflections for refinement.  R-factors based 
 on F^2^ are statistically about twice as large as those based on F, and R- 
 factors based on ALL data will be even larger. 
; 
  
_refine_ls_structure_factor_coef  Fsqd 
_refine_ls_matrix_type            full 
_refine_ls_weighting_scheme       calc 
_refine_ls_weighting_details 
 'calc w=1/[\s^2^(Fo^2^)+(0.0800P)^2^+0.0000P] where P=(Fo^2^+2Fc^2^)/3' 
_atom_sites_solution_primary      direct 
_atom_sites_solution_secondary    difmap 
_atom_sites_solution_hydrogens    geom 
_refine_ls_hydrogen_treatment     mixed 
_refine_ls_extinction_method      none 
_refine_ls_extinction_coef        ? 
_refine_ls_number_reflns          5600 
_refine_ls_number_parameters      467 
_refine_ls_number_restraints      4 
_refine_ls_R_factor_all           0.1268 
_refine_ls_R_factor_gt            0.0682 
_refine_ls_wR_factor_ref          0.1912 
_refine_ls_wR_factor_gt           0.1618 
_refine_ls_goodness_of_fit_ref    1.230 
_refine_ls_restrained_S_all       1.230 
_refine_ls_shift/su_max           0.000 
_refine_ls_shift/su_mean          0.000 
  
loop_ 
 _atom_site_label 
 _atom_site_type_symbol 
 _atom_site_fract_x 
 _atom_site_fract_y 
 _atom_site_fract_z 
 _atom_site_U_iso_or_equiv 
 _atom_site_adp_type 
 _atom_site_occupancy 
 _atom_site_symmetry_multiplicity 
 _atom_site_calc_flag 
 _atom_site_refinement_flags 
 _atom_site_disorder_assembly 
 _atom_site_disorder_group 
Ga1 Ga -0.19077(9) 0.98136(14) -0.21528(7) 0.0369(5) Uani 1 1 d . . . 
Ga2 Ga 0.18037(8) 0.73006(11) 0.00421(7) 0.0267(4) Uani 1 1 d . . . 
I11 I -0.27325(6) 0.87779(9) -0.17774(5) 0.0535(4) Uani 1 1 d . . . 
I12 I -0.23178(7) 1.12941(8) -0.22012(5) 0.0532(4) Uani 1 1 d . . . 
I21 I 0.28102(5) 0.64396(7) -0.01890(5) 0.0355(3) Uani 1 1 d . . . 
I22 I 0.20767(6) 0.86774(7) 0.05096(5) 0.0411(3) Uani 1 1 d . . . 
B1 B -0.0331(10) 0.9973(12) -0.2660(7) 0.028(4) Uani 1 1 d D . . 
H12 H 0.011(4) 1.009(9) -0.290(5) 0.034 Uiso 1 1 d D . . 
H11 H -0.076(4) 1.037(8) -0.276(5) 0.034 Uiso 1 1 d D . . 
B2 B 0.0197(10) 0.7610(11) 0.0048(8) 0.027(4) Uani 1 1 d D . . 
H22 H -0.027(3) 0.793(8) 0.015(5) 0.032 Uiso 1 1 d D . . 
H21 H 0.062(4) 0.790(8) 0.026(5) 0.032 Uiso 1 1 d D . . 
N11 N -0.0601(6) 0.9127(8) -0.2908(5) 0.026(2) Uani 1 1 d . . . 
N12 N -0.1293(6) 0.8145(9) -0.3227(5) 0.031(3) Uani 1 1 d . . . 
N21 N -0.0148(6) 0.9798(8) -0.2047(5) 0.026(2) Uani 1 1 d . . . 
N22 N -0.0289(6) 0.9640(8) -0.1170(5) 0.024(3) Uani 1 1 d . . . 
N31 N 0.0283(6) 0.7526(7) -0.0576(4) 0.017(3) Uani 1 1 d . . . 
N32 N 0.0754(6) 0.7386(8) -0.1365(5) 0.028(3) Uani 1 1 d . . . 
N41 N 0.0191(6) 0.6694(8) 0.0302(5) 0.023(3) Uani 1 1 d . . . 
N42 N 0.0572(6) 0.5477(7) 0.0685(5) 0.023(3) Uani 1 1 d . . . 
O11 O -0.1721(5) 0.9392(7) -0.2839(4) 0.039(3) Uani 1 1 d . . . 
O12 O -0.1198(5) 0.9697(7) -0.1683(4) 0.035(3) Uani 1 1 d . . . 
O21 O 0.1428(5) 0.7472(6) -0.0638(4) 0.026(2) Uani 1 1 d . . . 
O22 O 0.1329(5) 0.6505(6) 0.0431(4) 0.027(3) Uani 1 1 d . . . 
C11 C -0.1230(7) 0.8920(10) -0.2973(6) 0.028(4) Uani 1 1 d . . . 
C12 C -0.0246(8) 0.8411(10) -0.3127(6) 0.026(4) Uani 1 1 d . . . 
C13 C 0.0414(7) 0.8280(9) -0.3158(6) 0.025(4) Uani 1 1 d . . . 
H13A H 0.0713 0.8706 -0.3031 0.030 Uiso 1 1 calc R . . 
C14 C 0.0631(9) 0.7511(10) -0.3377(6) 0.035(4) Uani 1 1 d . . . 
H14A H 0.1084 0.7382 -0.3385 0.042 Uiso 1 1 calc R . . 
C15 C 0.0185(9) 0.6925(10) -0.3587(6) 0.033(4) Uani 1 1 d . . . 
H15A H 0.0339 0.6410 -0.3757 0.040 Uiso 1 1 calc R . . 
C16 C -0.0466(8) 0.7071(11) -0.3556(6) 0.032(4) Uani 1 1 d . . . 
H16A H -0.0765 0.6653 -0.3692 0.038 Uiso 1 1 calc R . . 
C17 C -0.0687(8) 0.7826(9) -0.3326(6) 0.022(3) Uani 1 1 d . . . 
C18 C -0.1929(8) 0.7752(13) -0.3374(6) 0.046(5) Uani 1 1 d . . . 
H18A H -0.2280 0.8167 -0.3297 0.069 Uiso 1 1 calc R . . 
H18B H -0.1997 0.7222 -0.3162 0.069 Uiso 1 1 calc R . . 
H18C H -0.1931 0.7609 -0.3760 0.069 Uiso 1 1 calc R . . 
C21 C -0.0589(8) 0.9717(10) -0.1648(6) 0.024(4) Uani 1 1 d . . . 
C22 C 0.0475(8) 0.9776(10) -0.1811(6) 0.028(4) Uani 1 1 d . . . 
C23 C 0.1081(8) 0.9852(10) -0.2021(7) 0.029(4) Uani 1 1 d . . . 
H23A H 0.1147 0.9954 -0.2396 0.035 Uiso 1 1 calc R . . 
C24 C 0.1592(9) 0.9777(12) -0.1674(7) 0.044(5) Uani 1 1 d . . . 
H24A H 0.2022 0.9788 -0.1815 0.053 Uiso 1 1 calc R . . 
C25 C 0.1505(8) 0.9685(11) -0.1114(8) 0.041(5) Uani 1 1 d . . . 
H25A H 0.1873 0.9676 -0.0881 0.049 Uiso 1 1 calc R . . 
C26 C 0.0895(7) 0.9609(9) -0.0902(6) 0.024(4) Uani 1 1 d . . . 
H26A H 0.0830 0.9522 -0.0525 0.029 Uiso 1 1 calc R . . 
C27 C 0.0367(8) 0.9661(9) -0.1258(6) 0.022(3) Uani 1 1 d . . . 
C28 C -0.0614(8) 0.9611(10) -0.0651(6) 0.028(4) Uani 1 1 d . . . 
H28A H -0.1076 0.9477 -0.0705 0.041 Uiso 1 1 calc R . . 
H28B H -0.0571 1.0177 -0.0472 0.041 Uiso 1 1 calc R . . 
H28C H -0.0414 0.9160 -0.0425 0.041 Uiso 1 1 calc R . . 
C31 C 0.0859(8) 0.7472(9) -0.0837(6) 0.021(4) Uani 1 1 d . . . 
C32 C -0.0208(8) 0.7461(9) -0.0980(6) 0.028(4) Uani 1 1 d . . . 
C33 C -0.0886(7) 0.7477(10) -0.0928(6) 0.026(4) Uani 1 1 d . . . 
H33A H -0.1097 0.7550 -0.0589 0.031 Uiso 1 1 calc R . . 
C34 C -0.1228(8) 0.7380(10) -0.1407(6) 0.029(4) Uani 1 1 d . . . 
H34A H -0.1691 0.7382 -0.1399 0.035 Uiso 1 1 calc R . . 
C35 C -0.0912(8) 0.7279(10) -0.1893(6) 0.034(3) Uani 1 1 d . . . 
H35A H -0.1169 0.7212 -0.2211 0.040 Uiso 1 1 calc R . . 
C36 C -0.0250(7) 0.7270(9) -0.1945(6) 0.023(4) Uani 1 1 d . . . 
H36A H -0.0042 0.7200 -0.2286 0.027 Uiso 1 1 calc R . . 
C37 C 0.0097(7) 0.7366(10) -0.1478(5) 0.021(4) Uani 1 1 d . . . 
C38 C 0.1278(7) 0.7299(10) -0.1773(6) 0.028(4) Uani 1 1 d . . . 
H38A H 0.1703 0.7331 -0.1594 0.043 Uiso 1 1 calc R . . 
H38B H 0.1242 0.7770 -0.2039 0.043 Uiso 1 1 calc R . . 
H38C H 0.1236 0.6738 -0.1958 0.043 Uiso 1 1 calc R . . 
C41 C 0.0718(8) 0.6235(10) 0.0466(6) 0.030(4) Uani 1 1 d . . . 
C42 C -0.0343(8) 0.6138(10) 0.0442(6) 0.028(4) Uani 1 1 d . . . 
C43 C -0.0992(7) 0.6282(10) 0.0379(6) 0.027(4) Uani 1 1 d . . . 
H43A H -0.1154 0.6809 0.0229 0.033 Uiso 1 1 calc R . . 
C44 C -0.1415(8) 0.5610(11) 0.0549(7) 0.034(4) Uani 1 1 d . . . 
H44A H -0.1872 0.5661 0.0491 0.041 Uiso 1 1 calc R . . 
C45 C -0.1169(8) 0.4884(11) 0.0797(6) 0.034(3) Uani 1 1 d . . . 
H45A H -0.1462 0.4453 0.0926 0.040 Uiso 1 1 calc R . . 
C46 C -0.0507(8) 0.4761(10) 0.0866(6) 0.031(4) Uani 1 1 d . . . 
H46A H -0.0341 0.4251 0.1034 0.038 Uiso 1 1 calc R . . 
C47 C -0.0096(7) 0.5406(9) 0.0680(5) 0.020(4) Uani 1 1 d . . . 
C48 C 0.1036(7) 0.4865(10) 0.0905(7) 0.031(4) Uani 1 1 d . . . 
H48A H 0.1479 0.5040 0.0802 0.046 Uiso 1 1 calc R . . 
H48B H 0.0945 0.4283 0.0763 0.046 Uiso 1 1 calc R . . 
H48C H 0.1000 0.4857 0.1301 0.046 Uiso 1 1 calc R . . 
  
loop_ 
 _atom_site_aniso_label 
 _atom_site_aniso_U_11 
 _atom_site_aniso_U_22 
 _atom_site_aniso_U_33 
 _atom_site_aniso_U_23 
 _atom_site_aniso_U_13 
 _atom_site_aniso_U_12 
Ga1 0.0259(10) 0.0564(13) 0.0283(11) -0.0026(10) -0.0002(8) 0.0134(9) 
Ga2 0.0255(10) 0.0271(10) 0.0274(10) 0.0024(8) -0.0043(7) -0.0035(8) 
I11 0.0284(7) 0.0747(10) 0.0575(9) 0.0092(7) 0.0009(6) 0.0010(7) 
I12 0.0549(9) 0.0509(8) 0.0537(8) 0.0045(6) 0.0027(6) 0.0097(7) 
I21 0.0262(6) 0.0380(7) 0.0423(7) 0.0010(6) -0.0015(5) 0.0030(5) 
I22 0.0409(7) 0.0352(7) 0.0471(7) -0.0078(6) -0.0032(6) -0.0048(5) 
B1 0.041(12) 0.026(11) 0.017(10) 0.006(8) -0.001(9) 0.008(9) 
B2 0.036(12) 0.006(9) 0.039(12) 0.005(8) -0.002(9) -0.006(8) 
N11 0.032(6) 0.029(5) 0.016(5) 0.002(4) 0.004(4) 0.005(4) 
N12 0.029(8) 0.034(8) 0.030(8) -0.007(7) 0.001(6) -0.005(7) 
N21 0.032(6) 0.029(5) 0.016(5) 0.002(4) 0.004(4) 0.005(4) 
N22 0.030(8) 0.032(8) 0.011(7) 0.002(6) 0.004(6) -0.010(6) 
N31 0.022(7) 0.020(7) 0.010(6) -0.003(5) 0.004(5) 0.005(5) 
N32 0.033(9) 0.013(7) 0.037(9) -0.005(6) 0.012(6) 0.004(6) 
N41 0.018(7) 0.029(7) 0.022(7) 0.006(6) -0.005(6) -0.002(6) 
N42 0.026(8) 0.019(7) 0.023(7) 0.001(6) 0.002(6) -0.005(6) 
O11 0.022(7) 0.052(8) 0.041(7) -0.009(6) -0.004(5) 0.006(6) 
O12 0.023(7) 0.060(8) 0.023(6) 0.009(6) 0.002(5) 0.001(6) 
O21 0.028(7) 0.031(6) 0.018(6) -0.004(5) 0.004(5) -0.002(5) 
O22 0.034(7) 0.029(6) 0.018(6) 0.007(5) -0.003(5) 0.002(5) 
C11 0.017(9) 0.039(11) 0.028(9) 0.004(8) 0.000(7) 0.006(8) 
C12 0.031(10) 0.034(10) 0.013(8) 0.005(7) 0.006(7) 0.000(8) 
C13 0.030(10) 0.019(9) 0.024(9) 0.004(7) 0.008(7) -0.007(7) 
C14 0.043(11) 0.029(10) 0.033(10) 0.006(8) 0.002(8) 0.000(9) 
C15 0.066(14) 0.015(9) 0.019(9) 0.002(7) 0.009(8) 0.007(9) 
C16 0.039(11) 0.039(11) 0.018(9) 0.014(8) -0.003(7) -0.016(9) 
C17 0.035(7) 0.019(6) 0.014(6) -0.002(5) 0.004(5) -0.006(5) 
C18 0.048(12) 0.073(14) 0.018(9) 0.002(9) -0.011(8) 0.000(10) 
C21 0.035(11) 0.022(9) 0.016(9) -0.002(7) -0.002(7) -0.003(8) 
C22 0.030(10) 0.021(8) 0.035(10) -0.005(8) -0.002(8) -0.011(7) 
C23 0.027(10) 0.028(9) 0.033(10) -0.002(8) 0.013(8) -0.005(8) 
C24 0.037(12) 0.053(12) 0.043(12) 0.005(10) 0.014(9) 0.006(9) 
C25 0.027(11) 0.032(10) 0.063(14) -0.007(9) -0.017(9) 0.003(8) 
C26 0.036(10) 0.024(9) 0.012(8) -0.006(7) 0.003(7) -0.007(7) 
C27 0.035(7) 0.019(6) 0.014(6) -0.002(5) 0.004(5) -0.006(5) 
C28 0.042(10) 0.021(9) 0.020(9) 0.009(7) 0.005(7) 0.008(8) 
C31 0.043(11) 0.009(8) 0.012(9) -0.001(6) 0.002(8) -0.001(7) 
C32 0.040(11) 0.019(9) 0.026(9) -0.001(7) 0.002(8) 0.004(8) 
C33 0.025(9) 0.034(10) 0.018(8) 0.000(7) -0.005(7) -0.004(7) 
C34 0.028(10) 0.022(9) 0.038(10) 0.009(8) 0.001(8) 0.005(7) 
C35 0.046(8) 0.042(8) 0.014(6) -0.003(6) -0.003(5) -0.006(6) 
C36 0.024(9) 0.029(9) 0.016(8) 0.001(7) 0.002(7) 0.008(7) 
C37 0.035(10) 0.018(8) 0.011(8) 0.000(7) -0.001(7) 0.002(7) 
C38 0.032(10) 0.025(9) 0.028(9) 0.004(8) 0.000(7) -0.005(7) 
C41 0.041(11) 0.033(10) 0.016(8) -0.003(8) 0.005(8) -0.013(9) 
C42 0.035(10) 0.027(9) 0.021(9) -0.005(7) -0.008(7) -0.006(8) 
C43 0.028(10) 0.035(10) 0.018(9) -0.004(7) 0.000(7) 0.003(8) 
C44 0.015(9) 0.049(11) 0.039(11) 0.007(9) -0.004(8) -0.006(8) 
C45 0.046(8) 0.042(8) 0.014(6) -0.003(6) -0.003(5) -0.006(6) 
C46 0.047(11) 0.027(9) 0.021(9) -0.008(8) 0.003(8) 0.006(9) 
C47 0.035(10) 0.013(8) 0.012(8) -0.004(7) -0.004(7) -0.007(7) 
C48 0.023(9) 0.022(9) 0.048(11) 0.016(8) -0.005(8) 0.006(7) 
  
_geom_special_details 
; 
 All esds (except the esd in the dihedral angle between two l.s. planes) 
 are estimated using the full covariance matrix.  The cell esds are taken 
 into account individually in the estimation of esds in distances, angles 
 and torsion angles; correlations between esds in cell parameters are only 
 used when they are defined by crystal symmetry.  An approximate (isotropic) 
 treatment of cell esds is used for estimating esds involving l.s. planes. 
; 
  
loop_ 
 _geom_bond_atom_site_label_1 
 _geom_bond_atom_site_label_2 
 _geom_bond_distance 
 _geom_bond_site_symmetry_2 
 _geom_bond_publ_flag 
Ga1 O11 1.855(11) . ? 
Ga1 O12 1.870(11) . ? 
Ga1 I12 2.430(2) . ? 
Ga1 I11 2.502(2) . ? 
Ga1 H11 2.91(13) . ? 
Ga1 B1 3.48(2) . ? 
Ga2 O22 1.836(10) . ? 
Ga2 O21 1.868(10) . ? 
Ga2 I22 2.476(2) . ? 
Ga2 I21 2.518(2) . ? 
Ga2 H21 2.66(12) . ? 
Ga2 B2 3.33(2) . ? 
B1 H11 1.098(10) . ? 
B1 N11 1.54(2) . ? 
B1 N21 1.58(2) . ? 
B2 H21 1.099(10) . ? 
B2 H22 1.100(10) . ? 
B2 N41 1.54(2) . ? 
B2 N31 1.56(2) . ? 
B2 H12 8.22(12) . ? 
N11 C11 1.340(19) . ? 
N11 C12 1.426(19) . ? 
N12 C11 1.353(19) . ? 
N12 C17 1.357(19) . ? 
N12 C18 1.48(2) . ? 
N21 C21 1.343(18) . ? 
N21 C22 1.403(19) . ? 
N22 C21 1.339(18) . ? 
N22 C27 1.363(19) . ? 
N22 C28 1.445(17) . ? 
N31 C31 1.348(18) . ? 
N31 C32 1.422(19) . ? 
N32 C31 1.331(18) . ? 
N32 C37 1.377(19) . ? 
N32 C38 1.480(18) . ? 
N41 C41 1.35(2) . ? 
N41 C42 1.431(19) . ? 
N42 C41 1.321(18) . ? 
N42 C47 1.374(18) . ? 
N42 C48 1.446(18) . ? 
O11 C11 1.285(17) . ? 
O12 C21 1.252(18) . ? 
O21 C31 1.265(17) . ? 
O22 C41 1.322(18) . ? 
C12 C17 1.37(2) . ? 
C12 C13 1.37(2) . ? 
C13 C14 1.38(2) . ? 
C14 C15 1.38(2) . ? 
C15 C16 1.36(2) . ? 
C16 C17 1.37(2) . ? 
C22 C23 1.35(2) . ? 
C22 C27 1.40(2) . ? 
C23 C24 1.36(2) . ? 
C24 C25 1.40(2) . ? 
C25 C26 1.36(2) . ? 
C26 C27 1.40(2) . ? 
C32 C37 1.39(2) . ? 
C32 C33 1.40(2) . ? 
C33 C34 1.38(2) . ? 
C34 C35 1.37(2) . ? 
C35 C36 1.37(2) . ? 
C36 C37 1.364(19) . ? 
C42 C43 1.36(2) . ? 
C42 C47 1.37(2) . ? 
C43 C44 1.41(2) . ? 
C44 C45 1.37(2) . ? 
C45 C46 1.38(2) . ? 
C46 C47 1.38(2) . ? 
  
loop_ 
 _geom_angle_atom_site_label_1 
 _geom_angle_atom_site_label_2 
 _geom_angle_atom_site_label_3 
 _geom_angle 
 _geom_angle_site_symmetry_1 
 _geom_angle_site_symmetry_3 
 _geom_angle_publ_flag 
O11 Ga1 O12 112.0(5) . . ? 
O11 Ga1 I12 110.7(4) . . ? 
O12 Ga1 I12 112.9(4) . . ? 
O11 Ga1 I11 104.8(4) . . ? 
O12 Ga1 I11 103.5(3) . . ? 
I12 Ga1 I11 112.38(8) . . ? 
O11 Ga1 H11 58(3) . . ? 
O12 Ga1 H11 73.6(19) . . ? 
I12 Ga1 H11 88.9(16) . . ? 
I11 Ga1 H11 157(2) . . ? 
O11 Ga1 B1 60.2(4) . . ? 
O12 Ga1 B1 60.5(4) . . ? 
I12 Ga1 B1 103.8(3) . . ? 
I11 Ga1 B1 143.8(3) . . ? 
H11 Ga1 B1 17.0(11) . . ? 
O22 Ga2 O21 110.3(4) . . ? 
O22 Ga2 I22 116.4(3) . . ? 
O21 Ga2 I22 113.1(3) . . ? 
O22 Ga2 I21 101.7(3) . . ? 
O21 Ga2 I21 102.0(3) . . ? 
I22 Ga2 I21 111.73(7) . . ? 
O22 Ga2 H21 69(3) . . ? 
O21 Ga2 H21 76(2) . . ? 
I22 Ga2 H21 79.4(16) . . ? 
I21 Ga2 H21 168(2) . . ? 
O22 Ga2 B2 64.4(4) . . ? 
O21 Ga2 B2 64.9(4) . . ? 
I22 Ga2 B2 95.7(3) . . ? 
I21 Ga2 B2 152.6(3) . . ? 
H21 Ga2 B2 16.8(15) . . ? 
H11 B1 N11 95(7) . . ? 
H11 B1 N21 119(7) . . ? 
N11 B1 N21 108.8(12) . . ? 
H11 B1 Ga1 51(7) . . ? 
N11 B1 Ga1 75.5(9) . . ? 
N21 B1 Ga1 82.2(9) . . ? 
H21 B2 H22 113(10) . . ? 
H21 B2 N41 101(7) . . ? 
H22 B2 N41 108(7) . . ? 
H21 B2 N31 114(7) . . ? 
H22 B2 N31 111(7) . . ? 
N41 B2 N31 109.1(12) . . ? 
H21 B2 Ga2 44(7) . . ? 
H22 B2 Ga2 157(7) . . ? 
N41 B2 Ga2 83.1(9) . . ? 
N31 B2 Ga2 82.7(9) . . ? 
H21 B2 H12 104(7) . . ? 
H22 B2 H12 88(7) . . ? 
N41 B2 H12 141.5(13) . . ? 
N31 B2 H12 33.2(11) . . ? 
Ga2 B2 H12 94.7(6) . . ? 
C11 N11 C12 105.2(13) . . ? 
C11 N11 B1 126.5(14) . . ? 
C12 N11 B1 128.3(13) . . ? 
C11 N12 C17 108.3(12) . . ? 
C11 N12 C18 123.7(14) . . ? 
C17 N12 C18 127.9(14) . . ? 
C21 N21 C22 107.8(12) . . ? 
C21 N21 B1 123.8(13) . . ? 
C22 N21 B1 128.1(13) . . ? 
C21 N22 C27 108.1(12) . . ? 
C21 N22 C28 125.0(13) . . ? 
C27 N22 C28 126.7(13) . . ? 
C31 N31 C32 106.4(11) . . ? 
C31 N31 B2 125.2(13) . . ? 
C32 N31 B2 128.4(12) . . ? 
C31 N32 C37 111.0(12) . . ? 
C31 N32 C38 124.1(13) . . ? 
C37 N32 C38 124.9(13) . . ? 
C41 N41 C42 103.2(12) . . ? 
C41 N41 B2 126.2(13) . . ? 
C42 N41 B2 130.6(13) . . ? 
C41 N42 C47 107.1(13) . . ? 
C41 N42 C48 125.4(13) . . ? 
C47 N42 C48 127.5(12) . . ? 
C11 O11 Ga1 126.6(10) . . ? 
C21 O12 Ga1 144.7(10) . . ? 
C31 O21 Ga2 136.8(9) . . ? 
C41 O22 Ga2 138.1(10) . . ? 
O11 C11 N11 126.1(15) . . ? 
O11 C11 N12 122.9(14) . . ? 
N11 C11 N12 110.9(13) . . ? 
C17 C12 C13 122.5(15) . . ? 
C17 C12 N11 107.9(13) . . ? 
C13 C12 N11 129.6(14) . . ? 
C12 C13 C14 117.9(15) . . ? 
C13 C14 C15 119.6(16) . . ? 
C16 C15 C14 121.4(16) . . ? 
C15 C16 C17 119.4(15) . . ? 
N12 C17 C12 107.6(13) . . ? 
N12 C17 C16 133.1(15) . . ? 
C12 C17 C16 119.2(15) . . ? 
O12 C21 N22 121.1(14) . . ? 
O12 C21 N21 128.7(14) . . ? 
N22 C21 N21 110.2(14) . . ? 
C23 C22 C27 122.1(15) . . ? 
C23 C22 N21 132.4(15) . . ? 
C27 C22 N21 105.5(13) . . ? 
C22 C23 C24 117.3(15) . . ? 
C23 C24 C25 122.2(16) . . ? 
C26 C25 C24 120.3(16) . . ? 
C25 C26 C27 117.8(14) . . ? 
N22 C27 C26 131.5(13) . . ? 
N22 C27 C22 108.3(13) . . ? 
C26 C27 C22 120.1(14) . . ? 
O21 C31 N32 122.0(14) . . ? 
O21 C31 N31 128.5(13) . . ? 
N32 C31 N31 109.4(14) . . ? 
C37 C32 C33 122.2(14) . . ? 
C37 C32 N31 108.1(13) . . ? 
C33 C32 N31 129.8(14) . . ? 
C34 C33 C32 115.1(14) . . ? 
C35 C34 C33 121.4(15) . . ? 
C36 C35 C34 123.6(15) . . ? 
C37 C36 C35 115.9(14) . . ? 
C36 C37 N32 133.1(14) . . ? 
C36 C37 C32 121.8(15) . . ? 
N32 C37 C32 105.1(12) . . ? 
N42 C41 O22 121.2(15) . . ? 
N42 C41 N41 113.6(14) . . ? 
O22 C41 N41 125.1(14) . . ? 
C43 C42 C47 123.1(15) . . ? 
C43 C42 N41 128.6(14) . . ? 
C47 C42 N41 108.2(13) . . ? 
C42 C43 C44 116.6(15) . . ? 
C45 C44 C43 120.2(15) . . ? 
C44 C45 C46 121.9(16) . . ? 
C47 C46 C45 117.4(15) . . ? 
C42 C47 N42 107.9(13) . . ? 
C42 C47 C46 120.6(15) . . ? 
N42 C47 C46 131.5(14) . . ? 
  
_diffrn_measured_fraction_theta_max    1.000 
_diffrn_reflns_theta_full              23.26 
_diffrn_measured_fraction_theta_full   1.000 
_refine_diff_density_max    3.911 
_refine_diff_density_min   -2.330 
_refine_diff_density_rms    0.238 
